# Supplementary material for: Anionic merocyanine dyes based on thiazol-2-hydrazides: reverse solvatochromism, preferential solvation and multiparametric approaches to spectral shifts
Source: Royal Society of Chemistry journal article supplement (doi:10.1039/c7cp06766f), 2018-01-01
Supplement: c7cp06766f1.pdf [file c7cp06766f1.pdf]

## ELECTRONIC SUPPLEMENTARY INFORMATION (ESI)

### Anionic Merocyanine Dyes Based on Thiazol-2-Hydrazides: Reverse Solvatochromism, Preferential Solvation and Multiparametric Approaches to Spectral Shifts

Arindam Mukhopadhyay,\* Krishna J. Mandal and Jarugu Narasimha Moorthy\*

Department of Chemistry, Indian Institute of Technology, Kanpur 208016, INDIA

\* Corresponding authors,

E-mail: [arindam389@gmail.com](mailto:arindam389@gmail.com) (for AM) and [moorthy@iitk.ac.in](mailto:moorthy@iitk.ac.in) (for JNM)

---

#### CONTENTS

---

|     |                                                                                                                                                        |         |
|-----|--------------------------------------------------------------------------------------------------------------------------------------------------------|---------|
| 1.  | UV-vis absorption spectra of <b>THA1</b> and <b>THA2</b> in different solvents                                                                         | S2      |
| 2.  | Spectrophotometric experiments to reveal the influence of counter cation                                                                               | S3-S4   |
| 3.  | Spectrophotometric experiments employed to discard the possibility of auto-aggregation of <b>THAs</b>                                                  | S5-S6   |
| 4.  | Changes in <sup>1</sup> H NMR signals of <b>TH2</b> upon addition of TBAOH                                                                             | S7      |
| 5.  | Preferential solvation studies in binary solvent mixtures                                                                                              | S8-S10  |
| 6.  | Kamlet-Taft and Catalán parameters for the solvents                                                                                                    | S11     |
| 7.  | Experimentally-determined and empirically-calculated $E_T(\text{dye})$ values of <b>THAs</b> using Catalán and Kamlet-Taft LSERs in different solvents | S12-S13 |
| 8.  | Results of DFT calculations                                                                                                                            | S14-S19 |
| 9.  | Results of NBO analyses                                                                                                                                | S20-S23 |
| 10. | References                                                                                                                                             | S24     |

---

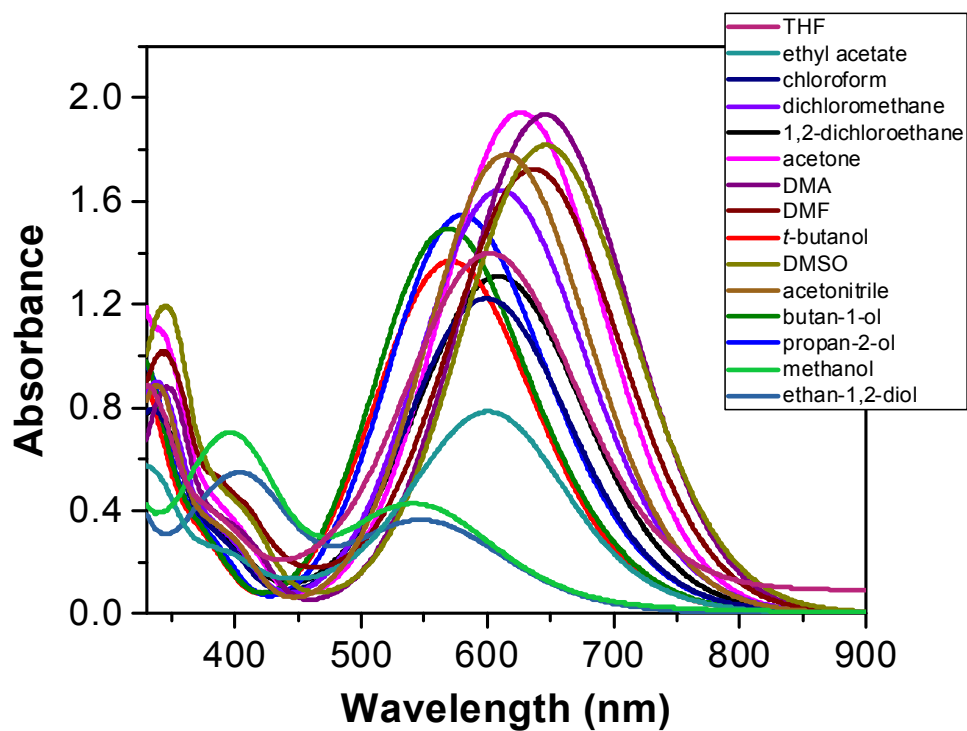

**Figure S1.** UV-vis absorption spectra of THA1 (50 μM) in different solvents.

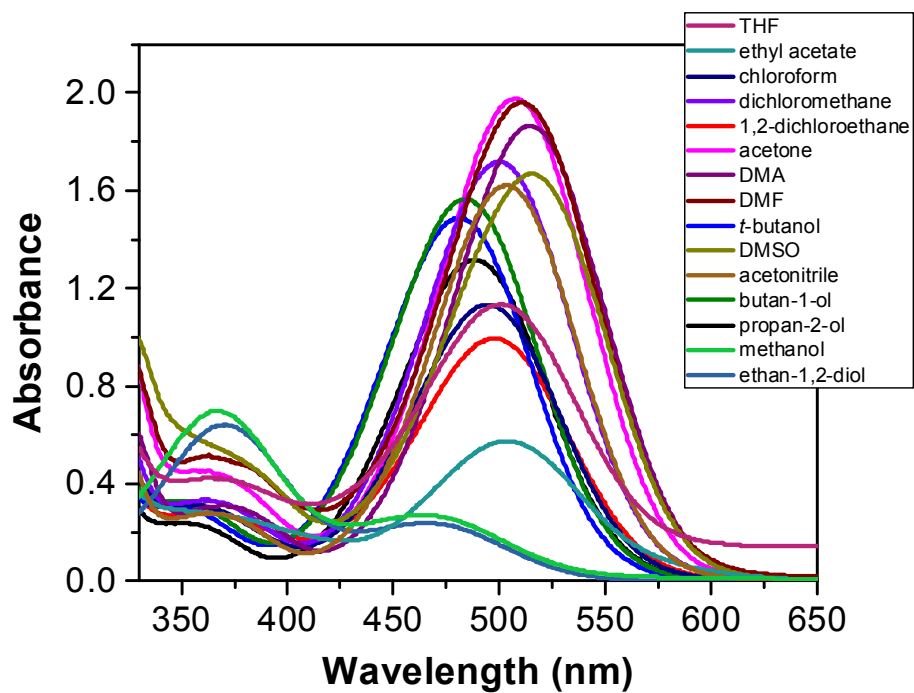

**Figure S2.** UV-vis absorption spectra of THA2 (50 μM) in different solvents.

**Spectrophotometric Experiments to Reveal the Influence of Counter Cation.** To investigate whether or not the anionic **THA** dyes form ion pair with the counter cation, UV-vis absorption spectra of the **THAs** (50  $\mu$ M) were recorded in the presence of excess of tetra-*n*-butylammonium iodide, i.e., TBAI (concentration = 1 mM, i.e., 20 equivalents) in THF as a representative solvent. As shown below, the absorption maximum of both **THA1** (603 nm) and **THA2** (501 nm) was found to remain the same before and after the addition of TBAI. This experiment, thus, establishes the fact that the TBA cation doesn't form ion pair with the anionic **THA** dyes. Similar results were also obtained by Machado and co-workers.<sup>1</sup>

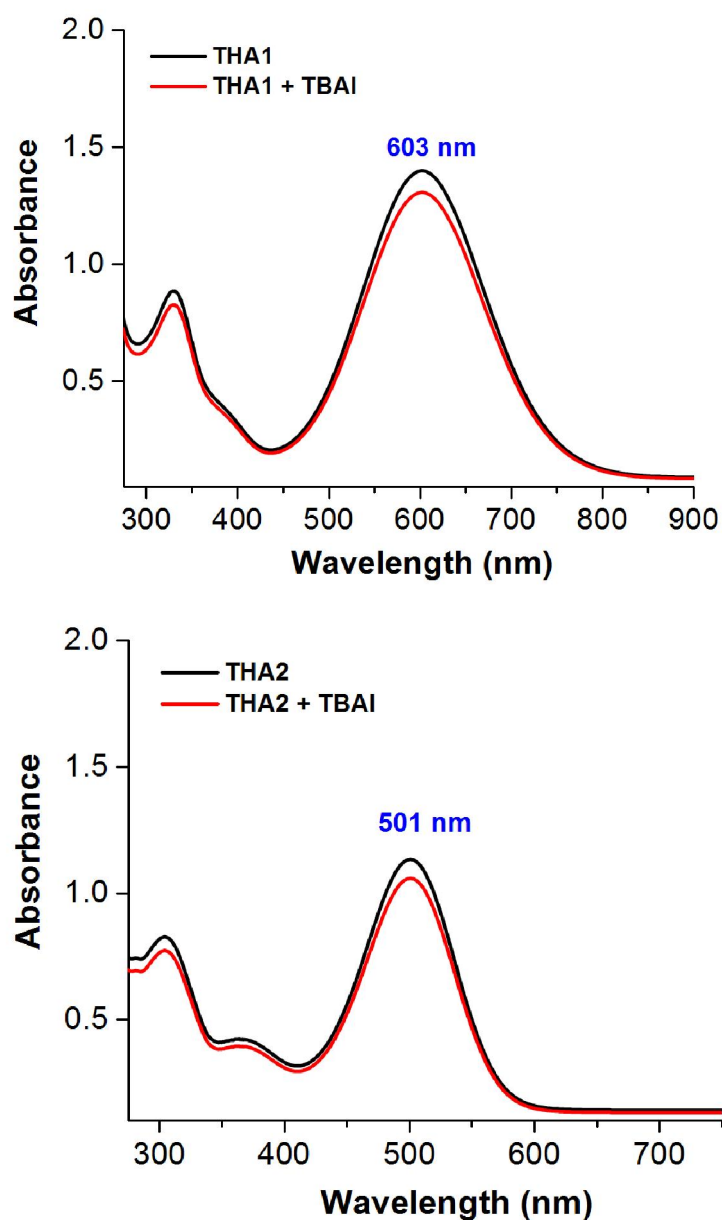

**Figure S3.** UV-vis absorption spectra (50  $\mu$ M) of **THA1** (top) and **THA2** (bottom) in the absence (black line) and in the presence (red line) of TBAI (1 mM) in THF.

To further investigate the influence of other counter cation, such as  $K^+$ , the deprotonation of **TH1**, a representative case, in THF (50  $\mu$ M) was carried out in the presence of aq. KOH ( $5 \times 10^{-4}$  M, i.e., 10 equivalents). The  $\lambda_{\text{max}}$  of the colored solution (**THA1**) in this case was found to be at 558 nm, which is 45 nm blue shifted when compared to that of the colored solution generated in the presence of TBAOH ( $\lambda_{\text{max}} = 603$  nm). This suggests strong electrostatic interaction between the hydrazide anion and  $K^+$  cation. However, when this colored solution was treated with excess ( $5 \times 10^{-3}$  M) of 18-crown-6, a highly selective receptor of  $K^+$ , the absorption spectrum was found to be almost the same which is obtained in the presence of TBAOH ( $5 \times 10^{-4}$  M) in THF. This compellingly attests to the fact that the TBA cation doesn't have any influence on the spectral properties of the anionic dyes. Similar results were also obtained by Machado and co-workers.<sup>1</sup>

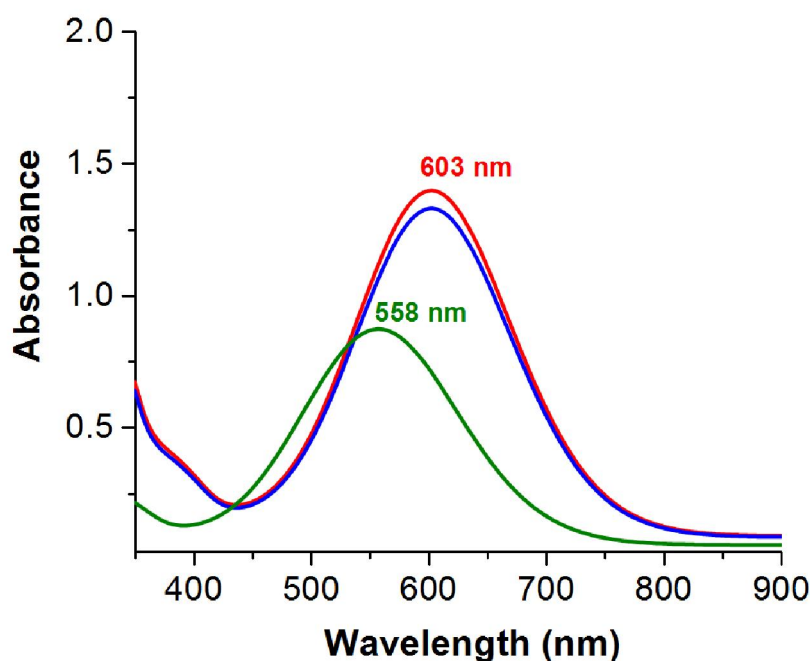

**Figure S4.** UV-vis absorption spectra of **THA1** in THF under different conditions.

Red line: When the deprotonation of **TH1** (50  $\mu$ M) is carried out using TBAOH ( $5 \times 10^{-4}$  M); Green line: When the deprotonation of **TH1** (50  $\mu$ M) is carried out using KOH ( $5 \times 10^{-4}$  M); and Blue line: After addition of excess of 18-crown-6 ( $5 \times 10^{-3}$  M) to the solution of **THA1** deprotonated with KOH. Notice that the absorption maxima of the red and blue lines are the same.

**Spectrophotometric Experiments Employed to Discard the Possibility of Auto-Aggregation of THAs.** To establish the fact that auto-aggregation of the **THA** dyes doesn't take place at the concentration (50  $\mu\text{M}$ ) used for solvatochromic studies, we followed the methodology established by El Seoud and co-workers.<sup>2</sup> Accordingly, the absorbances of the solutions of the **THAs** were plotted with increasing concentration of the latter in the range of ca.  $5 \times 10^{-6}$  M to  $7 \times 10^{-5}$  M in three representative solvents, namely, THF, MeCN and MeOH. As shown below, all the plots of absorbance versus concentration were found to be linear with excellent goodness-of-fit ( $R^2 = 0.99$ ) values. This means that Beer's law holds true for them and therefore, this establishes that self-aggregation of the **THA** dyes doesn't occur in this concentration range.

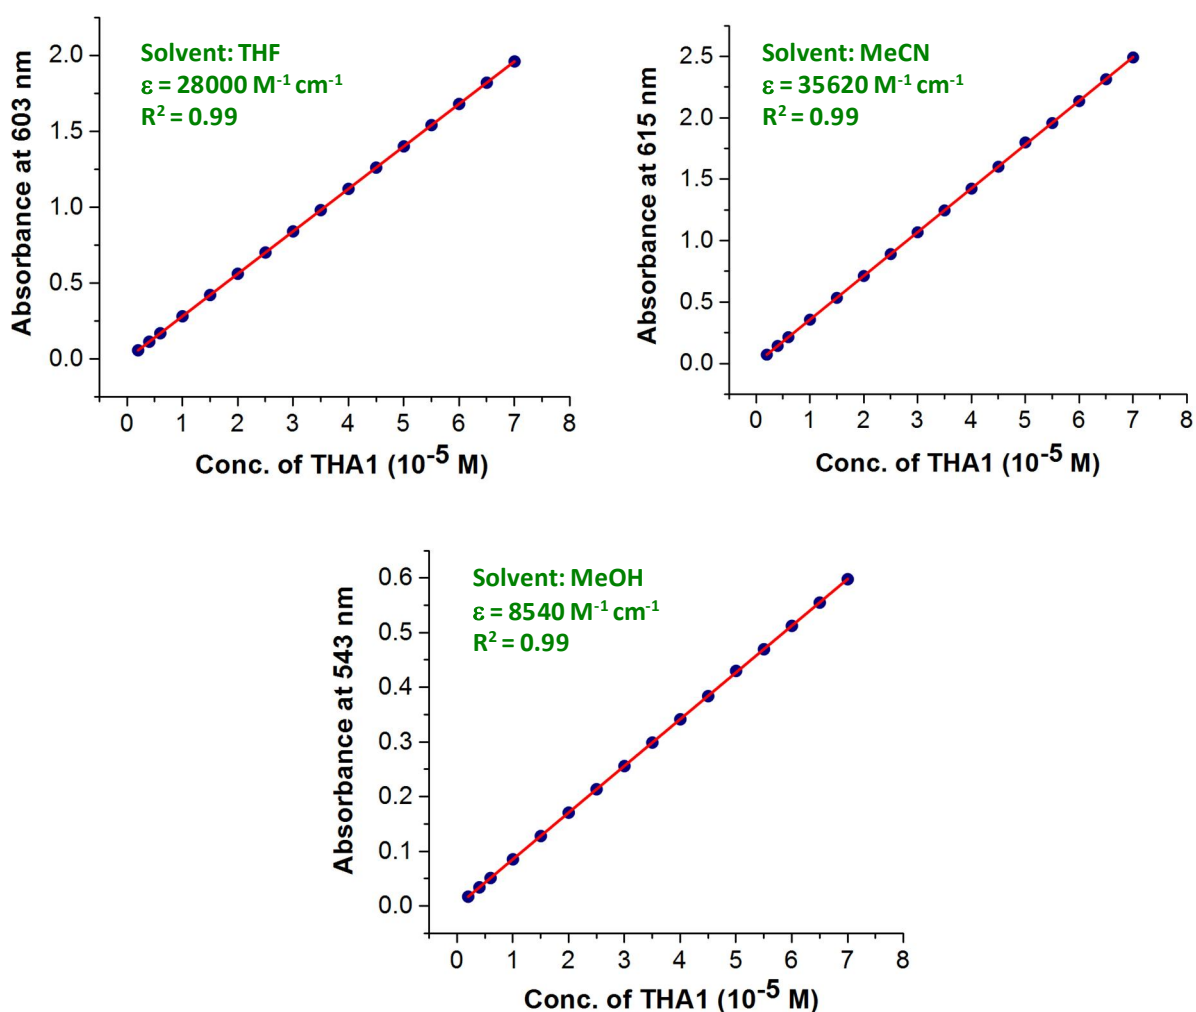

**Figure S5.** Linear plot of the absorbance (at the  $\lambda_{\text{max}}$ ) versus concentration of **THA1** in different solvents.

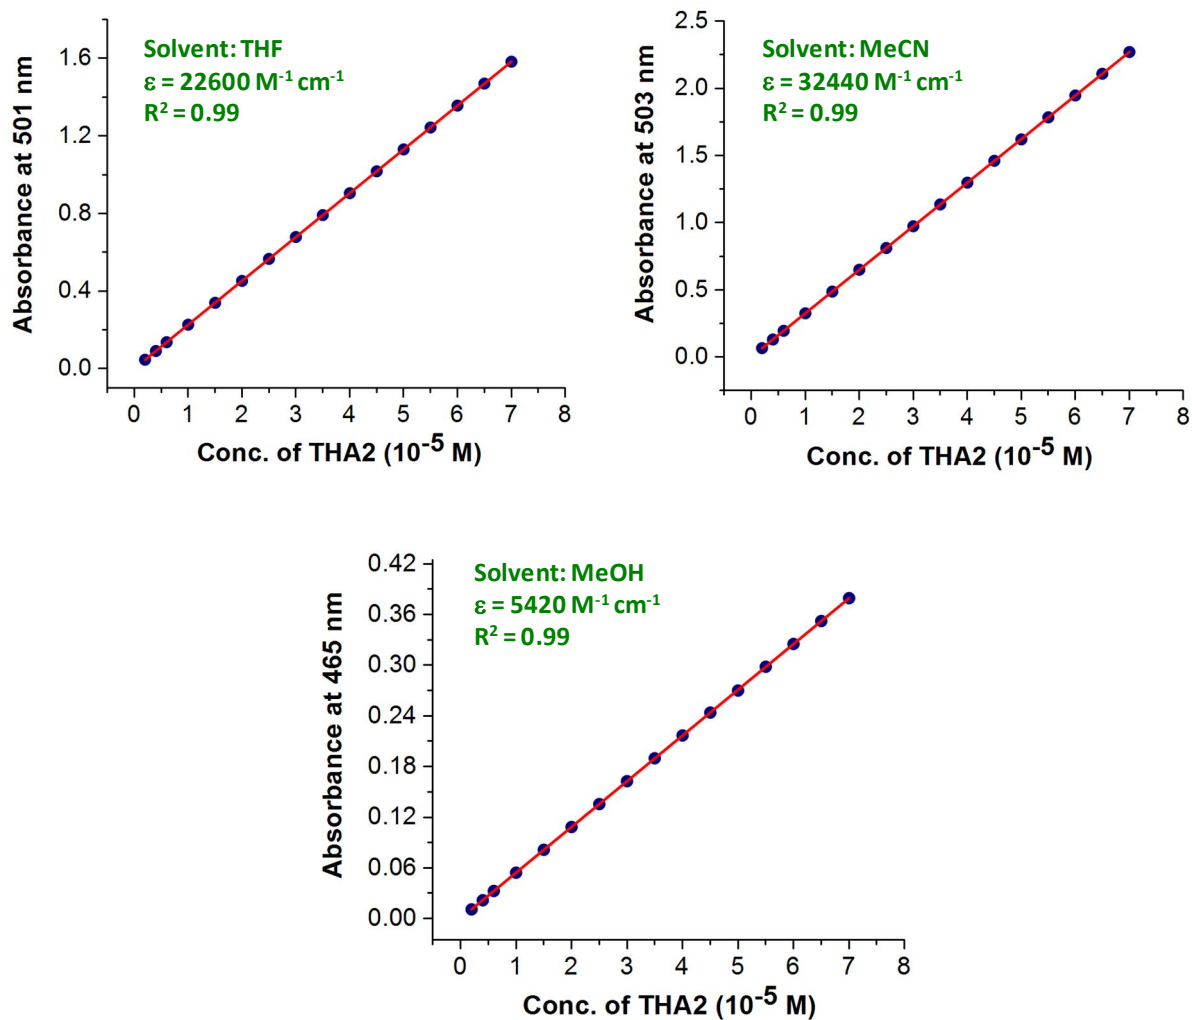

**Figure S6.** Linear plot of the absorbance (at the  $\lambda_{\text{max}}$ ) versus concentration of **THA2** in different solvents.

**Changes in  $^1\text{H}$  NMR Signals of TH2 upon Addition of TBAOH.** The changes in the  $^1\text{H}$  NMR signals of TH2 upon addition of TBAOH are shown below. Accordingly one observes the following: i) the doublets ( $\text{H}_f$  and  $\text{H}_g$ ) corresponding to 4-cyanophenyl ring undergo substantial upfield shifts (ca. 0.23-0.26 ppm); ii) while the singlet corresponding to the benzylidene proton ( $\text{H}_e$ ) undergoes an upfield shift of ca. 0.20 ppm, the singlet proton of the thiazole ring ( $\text{H}_a$ ) undergoes highest upfield shift of ca. 0.50 ppm; and iii) the protons of the phenyl ring ( $\text{H}_b$ ,  $\text{H}_c$  and  $\text{H}_d$ ) substituted at position 4 of the thiazole ring undergo only marginal upfield shifts.

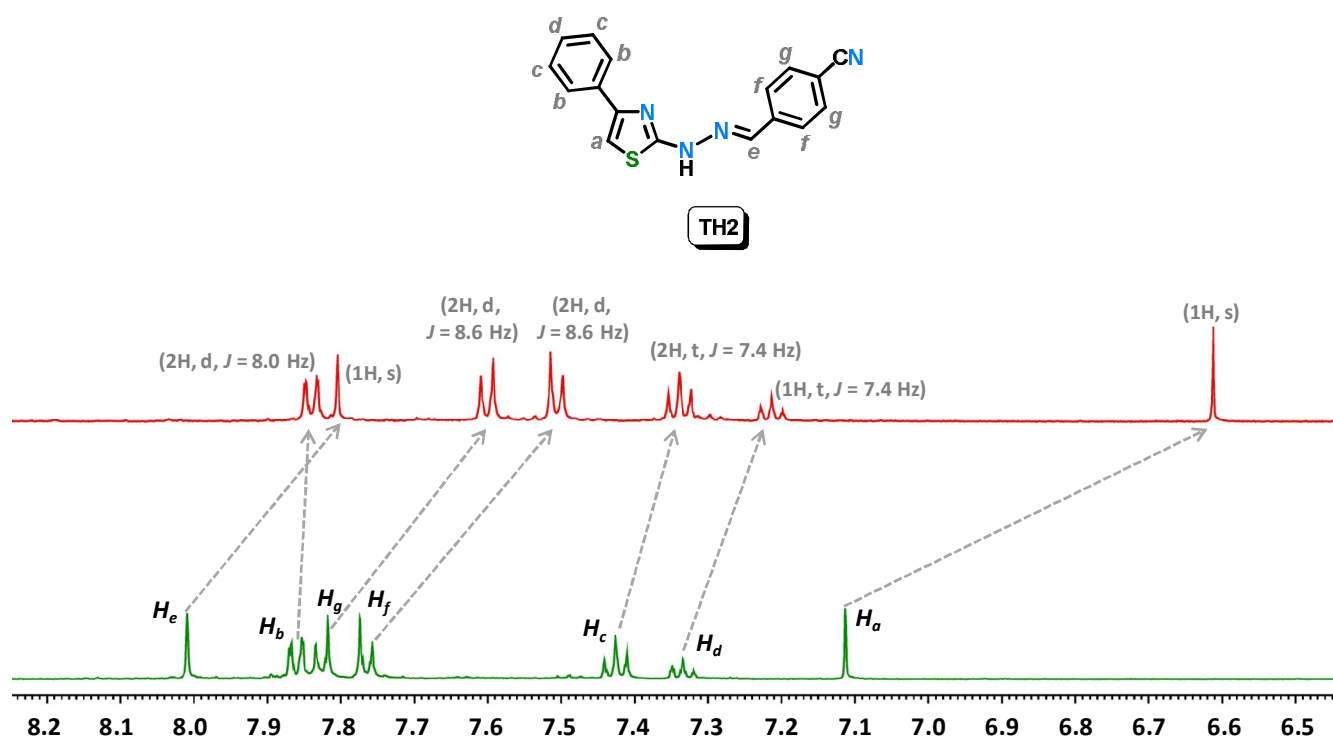

**Figure S7.**  $^1\text{H}$  NMR (500 MHz) spectra of TH2 (0.03 M) in  $\text{CD}_3\text{CN}$  before (green) and after (red) addition of excess (ca. 10 molar equivalents) TBAOH.

**Table S1.** Preferential solvation study of **THA1** in a binary solvent mixture.

| Binary mixture of solvents                          | $X_2$   | $X_2^L$ | $X_1^L$<br>$= (1 - X_2^L)$ | $\lambda_{\max}$<br>(nm) | $\bar{\nu}_{12}$<br>( $\text{cm}^{-1}$ ) | $\delta_{s2}$<br>$= (X_2^L - X_2)$ | $K_{12}$ |
|-----------------------------------------------------|---------|---------|----------------------------|--------------------------|------------------------------------------|------------------------------------|----------|
| acetonitrile ( $X_1$ )<br>and<br>methanol ( $X_2$ ) | 0.0285  | 0.18854 | 0.81146                    | 600                      | 16666.67                                 | 0.16004                            | 0.12628  |
|                                                     | 0.05543 | 0.293   | 0.707                      | 592                      | 16891.89                                 | 0.23758                            | 0.14159  |
|                                                     | 0.10504 | 0.41395 | 0.58605                    | 583                      | 17152.66                                 | 0.30892                            | 0.16616  |
|                                                     | 0.14969 | 0.49668 | 0.50332                    | 577                      | 17331.02                                 | 0.34699                            | 0.1784   |
|                                                     | 0.22685 | 0.58114 | 0.41886                    | 571                      | 17513.13                                 | 0.3543                             | 0.21147  |
|                                                     | 0.29117 | 0.6529  | 0.3471                     | 566                      | 17667.84                                 | 0.36173                            | 0.21838  |
|                                                     | 0.34561 | 0.69657 | 0.30343                    | 563                      | 17761.99                                 | 0.35096                            | 0.23006  |
|                                                     | 0.39228 | 0.7407  | 0.2593                     | 560                      | 17857.14                                 | 0.34842                            | 0.22597  |
|                                                     | 0.43274 | 0.77039 | 0.22961                    | 558                      | 17921.15                                 | 0.33765                            | 0.22737  |
|                                                     | 0.46815 | 0.80028 | 0.19972                    | 556                      | 17985.61                                 | 0.33214                            | 0.21966  |
|                                                     | 0.4994  | 0.81532 | 0.18468                    | 555                      | 18018.018                                | 0.31592                            | 0.22597  |
|                                                     | 0.52717 | 0.8304  | 0.1696                     | 554                      | 18050.54                                 | 0.30323                            | 0.22772  |
|                                                     | 0.55203 | 0.84554 | 0.15446                    | 553                      | 18083.18                                 | 0.29351                            | 0.22511  |
|                                                     | 0.56351 | 0.84554 | 0.15446                    | 553                      | 18083.18                                 | 0.28203                            | 0.23583  |
|                                                     | 0.58679 | 0.86073 | 0.13927                    | 552                      | 18115.94                                 | 0.27394                            | 0.22977  |
|                                                     | 0.61208 | 0.87598 | 0.12402                    | 551                      | 18148.82                                 | 0.2639                             | 0.22339  |
|                                                     | 0.63965 | 0.89129 | 0.10871                    | 550                      | 18181.82                                 | 0.25163                            | 0.21651  |
|                                                     | 0.66983 | 0.90665 | 0.09335                    | 549                      | 18214.94                                 | 0.23682                            | 0.20888  |
|                                                     | 0.70298 | 0.92207 | 0.07793                    | 548                      | 18248.17                                 | 0.21908                            | 0.20005  |
|                                                     | 0.7396  | 0.93754 | 0.06246                    | 547                      | 18281.53                                 | 0.19794                            | 0.18922  |
| 0.78023                                             | 0.93754 | 0.06246 | 547                        | 18281.53                 | 0.15731                                  | 0.23653                            |          |
| 0.82559                                             | 0.95307 | 0.04693 | 546                        | 18315.02                 | 0.12748                                  | 0.2331                             |          |
| 0.87655                                             | 0.9843  | 0.0157  | 544                        | 18382.35                 | 0.10775                                  | 0.11327                            |          |
| 0.93421                                             | 0.9843  | 0.0157  | 544                        | 18382.35                 | 0.05008                                  | 0.22653                            |          |



**Table S2.** Preferential solvation study of **THA2** in a binary solvent mixture.

| Binary mixture of solvents                          | $X_2$   | $X_2^L$ | $X_1^L$<br>$= (1 - X_2^L)$ | $\lambda_{\max}$<br>(nm) | $\bar{\nu}_{12}$<br>( $\text{cm}^{-1}$ ) | $\delta_{s2}$<br>$= (X_2^L - X_2)$ | $K_{12}$ |
|-----------------------------------------------------|---------|---------|----------------------------|--------------------------|------------------------------------------|------------------------------------|----------|
| acetonitrile ( $X_1$ )<br>and<br>methanol ( $X_2$ ) | 0.0285  | 0.12286 | 0.87714                    | 498                      | 20080.32                                 | 0.09436                            | 0.20945  |
|                                                     | 0.05543 | 0.24821 | 0.75179                    | 493                      | 20283.97                                 | 0.19278                            | 0.17774  |
|                                                     | 0.10504 | 0.32465 | 0.67535                    | 490                      | 20408.16                                 | 0.21961                            | 0.24415  |
|                                                     | 0.14969 | 0.37613 | 0.62387                    | 488                      | 20491.80                                 | 0.22644                            | 0.29199  |
|                                                     | 0.22685 | 0.42804 | 0.57196                    | 486                      | 20576.13                                 | 0.20119                            | 0.39207  |
|                                                     | 0.29117 | 0.48037 | 0.51963                    | 484                      | 20661.15                                 | 0.1892                             | 0.44435  |
|                                                     | 0.34561 | 0.53314 | 0.46686                    | 482                      | 20746.88                                 | 0.18753                            | 0.46248  |
|                                                     | 0.39228 | 0.58635 | 0.41365                    | 480                      | 20833.33                                 | 0.19407                            | 0.45538  |
|                                                     | 0.43274 | 0.61312 | 0.38688                    | 479                      | 20876.82                                 | 0.18038                            | 0.48137  |
|                                                     | 0.46815 | 0.64    | 0.36                       | 478                      | 20920.50                                 | 0.17185                            | 0.49513  |
|                                                     | 0.4994  | 0.667   | 0.333                      | 477                      | 20964.36                                 | 0.1676                             | 0.49806  |
|                                                     | 0.52717 | 0.6941  | 0.3059                     | 476                      | 21008.40                                 | 0.16693                            | 0.49136  |
|                                                     | 0.55203 | 0.72133 | 0.27867                    | 475                      | 21052.63                                 | 0.1693                             | 0.47608  |
|                                                     | 0.56351 | 0.74867 | 0.25133                    | 474                      | 21097.04                                 | 0.18516                            | 0.4334   |
|                                                     | 0.58679 | 0.77612 | 0.22388                    | 473                      | 21141.64                                 | 0.18933                            | 0.40964  |
|                                                     | 0.61208 | 0.80369 | 0.19631                    | 472                      | 21186.44                                 | 0.19161                            | 0.38541  |
|                                                     | 0.63965 | 0.83138 | 0.16862                    | 471                      | 21231.42                                 | 0.19173                            | 0.36004  |
|                                                     | 0.66983 | 0.85918 | 0.14082                    | 470                      | 21276.59                                 | 0.18935                            | 0.33251  |
|                                                     | 0.70298 | 0.8871  | 0.1129                     | 469                      | 21321.96                                 | 0.18412                            | 0.30121  |
|                                                     | 0.7396  | 0.91515 | 0.08485                    | 468                      | 21367.52                                 | 0.17555                            | 0.26335  |
| 0.78023                                             | 0.94331 | 0.05669 | 467                        | 21413.27                 | 0.16308                                  | 0.21336                            |          |
| 0.82559                                             | 0.94331 | 0.05669 | 467                        | 21413.27                 | 0.11772                                  | 0.28448                            |          |
| 0.87655                                             | 0.97159 | 0.02841 | 466                        | 21459.22                 | 0.09504                                  | 0.2076                             |          |
| 0.93421                                             | 0.97159 | 0.02841 | 466                        | 21459.22                 | 0.03738                                  | 0.41521                            |          |

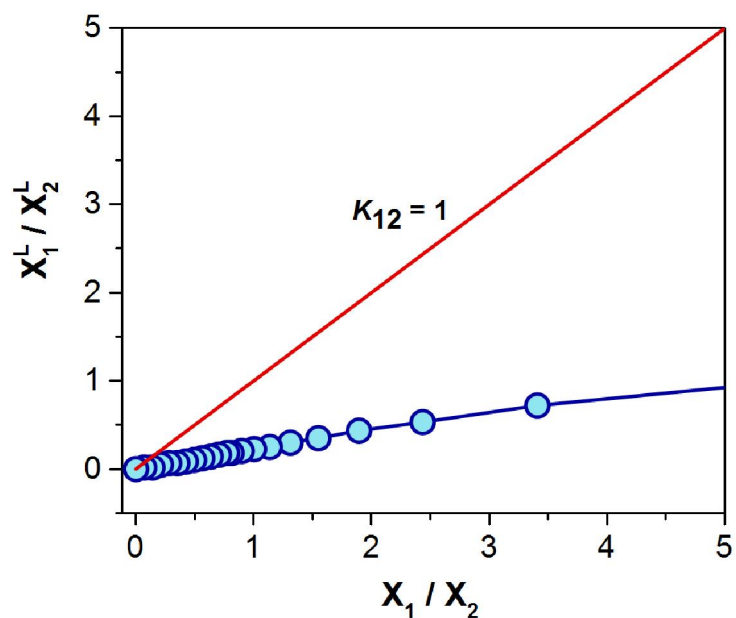

**Figure S8.** Plot of  $(X_1^L/X_2^L)$  versus  $(X_1/X_2)$  in the acetonitrile/methanol binary mixture for the solvation of **THA1**. The red line signifies the case when the slope is 1, i.e.,  $K_{12} = 1$ .

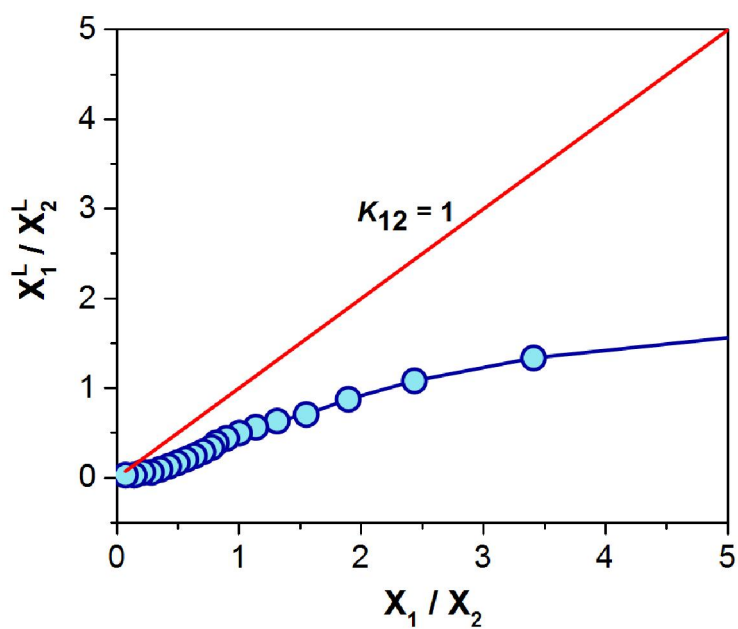

**Figure S9.** Plot of  $(X_1^L/X_2^L)$  versus  $(X_1/X_2)$  in the acetonitrile/methanol binary mixture for the solvation of **THA2**. The red line signifies the case when the slope is 1, i.e.,  $K_{12} = 1$ .

**Table S3.** Kamlet-Taft and Catalán parameters for the solvents used. <sup>a</sup>

| Solvent                             | Kamlet-Taft Parameters |         |         | Catalán Parameters |      |      |      |
|-------------------------------------|------------------------|---------|---------|--------------------|------|------|------|
|                                     | $\alpha$               | $\beta$ | $\pi^*$ | SA                 | SB   | SP   | SdP  |
| tetrahydrofuran (THF)               | 0                      | 0.55    | 0.58    | 0                  | 0.48 | 0.56 | 0.66 |
| ethyl acetate                       | 0.00                   | 0.45    | 0.45    | 0                  | 0.54 | 0.65 | 0.60 |
| chloroform                          | 0.20                   | 0.10    | 0.58    | 0.05               | 0.07 | 0.78 | 0.61 |
| dichloromethane                     | 0.13                   | 0.10    | 0.82    | 0.04               | 0.17 | 0.76 | 0.76 |
| 1,2-dichloroethane                  | 0.0                    | 0.0     | 0.81    | 0.03               | 0.13 | 0.77 | 0.74 |
| acetone                             | 0.08                   | 0.43    | 0.71    | 0                  | 0.47 | 0.65 | 0.90 |
| <i>N,N</i> -dimethylacetamide (DMA) | 0.00                   | 0.76    | 0.88    | 0.03               | 0.65 | 0.76 | 0.99 |
| <i>N,N</i> -dimethylformamide (DMF) | 0.00                   | 0.69    | 0.88    | 0.03               | 0.61 | 0.76 | 0.98 |
| <i>t</i> -butanol                   | 0.42                   | 0.93    | 0.41    | 0.14               | 0.93 | 0.63 | 0.73 |
| dimethyl sulfoxide (DMSO)           | 0.00                   | 0.76    | 1.00    | 0.07               | 0.65 | 0.83 | 1    |
| acetonitrile                        | 0.19                   | 0.40    | 0.66    | 0.04               | 0.29 | 0.64 | 0.97 |
| butan-1-ol                          | 0.79                   | 0.88    | 0.47    | 0.34               | 0.81 | 0.67 | 0.66 |
| propan-2-ol                         | 0.76                   | 0.84    | 0.48    | 0.28               | 0.83 | 0.63 | 0.81 |
| methanol                            | 0.98                   | 0.66    | 0.60    | 0.6                | 0.54 | 0.61 | 0.9  |
| ethane-1,2-diol                     | 0.90                   | 0.52    | 0.92    | 0.72               | 0.53 | 0.78 | 0.91 |

<sup>a</sup> The numerical values of the parameters are taken from references 3-7.

**Table S4.** Experimentally-determined and empirically-calculated  $E_T(\text{dye})$  values of **THA1** using Catalán and Kamlet-Taft LSERs in different solvents.

| Solvent            | $E_T(\text{dye})$ (kcal/mol) |                      |             |
|--------------------|------------------------------|----------------------|-------------|
|                    | Experimental                 | Calculated from LSER |             |
|                    |                              | Catalán              | Kamlet-Taft |
| THF                | 47.41294                     | 47.30201             | 46.20275    |
| ethyl acetate      | 47.57072                     | 48.10488             | 46.20275    |
| chloroform         | 47.72955                     | 47.73393             | 48.33359    |
| dichloromethane    | 46.86885                     | 46.63101             | 47.14961    |
| 1,2-dichloroethane | 46.94581                     | 46.67876             | 46.53698    |
| acetone            | 45.67093                     | 46.09396             | 46.54312    |
| DMA                | 44.25697                     | 44.66105             | 44.88609    |
| DMF                | 44.88226                     | 44.75959             | 45.01838    |
| <i>t</i> -butanol  | 49.98252                     | 48.62597             | 48.6947     |
| DMSO               | 44.25697                     | 44.33599             | 44.51817    |
| acetonitrile       | 46.4878                      | 46.30775             | 47.45734    |
| butan-1-ol         | 50.15789                     | 50.87148             | 50.97401    |
| propan-2-ol        | 49.2931                      | 49.5818              | 50.82688    |
| methanol           | 52.65193                     | 52.64554             | 52.20759    |
| ethane-1,2-diol    | 52.36264                     | 52.19712             | 50.97889    |

**Table S5.** Experimentally-determined and empirically-calculated  $E_T(\text{dye})$  values of **THA2** using Catalán and Kamlet-Taft LSERs in different solvents.

| Solvent            | $E_T(\text{dye})$ (kcal/mol) |                      |             |
|--------------------|------------------------------|----------------------|-------------|
|                    | Experimental                 | Calculated from LSER |             |
|                    |                              | Catalán              | Kamlet-Taft |
| THF                | 57.06587                     | 56.86821             | 55.79729    |
| ethyl acetate      | 56.72619                     | 57.19804             | 55.99143    |
| chloroform         | 57.87449                     | 57.45096             | 57.20398    |
| dichloromethane    | 57.29459                     | 57.20117             | 56.75708    |
| 1,2-dichloroethane | 57.40964                     | 57.16966             | 56.31194    |
| acetone            | 56.39053                     | 56.97959             | 56.21304    |
| DMA                | 55.51456                     | 56.45886             | 55.37377    |
| DMF                | 58.46626                     | 56.50761             | 55.45641    |
| <i>t</i> -butanol  | 59.31535                     | 57.76065             | 57.28667    |
| DMSO               | 55.51456                     | 56.41779             | 55.30353    |
| acetonitrile       | 56.83897                     | 57.41539             | 56.75922    |
| butan-1-ol         | 57.29459                     | 59.13504             | 58.93017    |
| propan-2-ol        | 59.07025                     | 58.73012             | 58.84022    |
| methanol           | 61.48387                     | 61.18531             | 59.94548    |
| ethane-1,2-diol    | 61.48387                     | 61.26517             | 59.57325    |

## Results of DFT Calculations

**Table S6.** Cartesian coordinates for the optimized structure of **TH1**.

| Center Number | Atomic Number | Atomic Type | Coordinates (Angstroms) |           |           |
|---------------|---------------|-------------|-------------------------|-----------|-----------|
|               |               |             | X                       | Y         | Z         |
| 1             | 6             | 0           | -5.583544               | 1.027250  | -0.273009 |
| 2             | 6             | 0           | -4.217679               | 0.854477  | -0.002079 |
| 3             | 6             | 0           | -3.440175               | 1.988774  | 0.271570  |
| 4             | 6             | 0           | -4.015956               | 3.256325  | 0.284627  |
| 5             | 6             | 0           | -5.375105               | 3.415827  | 0.021959  |
| 6             | 6             | 0           | -6.156119               | 2.294265  | -0.258826 |
| 7             | 1             | 0           | -6.203339               | 0.170788  | -0.512660 |
| 8             | 1             | 0           | -2.384246               | 1.860926  | 0.471305  |
| 9             | 1             | 0           | -3.399554               | 4.122032  | 0.500265  |
| 10            | 1             | 0           | -5.822076               | 4.403452  | 0.030294  |
| 11            | 1             | 0           | -7.212577               | 2.408075  | -0.474834 |
| 12            | 6             | 0           | -3.593218               | -0.482324 | 0.002213  |
| 13            | 6             | 0           | -4.251071               | -1.681084 | 0.006201  |
| 14            | 6             | 0           | -1.822849               | -1.806376 | 0.024016  |
| 15            | 1             | 0           | -5.309457               | -1.881648 | 0.025095  |
| 16            | 7             | 0           | -2.209413               | -0.576040 | 0.017878  |
| 17            | 16            | 0           | -3.120938               | -3.006374 | 0.015452  |
| 18            | 7             | 0           | -0.513599               | -2.245840 | 0.029904  |
| 19            | 1             | 0           | -0.338624               | -3.246591 | 0.048283  |
| 20            | 7             | 0           | 0.516356                | -1.386419 | 0.012858  |
| 21            | 6             | 0           | 1.706109                | -1.870070 | 0.025437  |
| 22            | 1             | 0           | 1.884538                | -2.951973 | 0.050685  |
| 23            | 6             | 0           | 2.879173                | -1.001567 | 0.006920  |
| 24            | 6             | 0           | 4.159344                | -1.578652 | 0.028963  |
| 25            | 6             | 0           | 2.762609                | 0.400500  | -0.032695 |
| 26            | 6             | 0           | 5.299565                | -0.786854 | 0.013551  |
| 27            | 1             | 0           | 4.261908                | -2.657988 | 0.058693  |
| 28            | 6             | 0           | 3.892980                | 1.199328  | -0.048517 |
| 29            | 1             | 0           | 1.776138                | 0.845637  | -0.050942 |
| 30            | 6             | 0           | 5.150937                | 0.595394  | -0.024910 |
| 31            | 1             | 0           | 6.290570                | -1.218560 | 0.030629  |
| 32            | 1             | 0           | 3.821091                | 2.277776  | -0.078876 |
| 33            | 7             | 0           | 6.355908                | 1.444447  | -0.041052 |
| 34            | 8             | 0           | 6.196872                | 2.659362  | -0.074852 |
| 35            | 8             | 0           | 7.447609                | 0.886357  | -0.019499 |

**Table S7.** Cartesian coordinates for the optimized structure of **THA1**.

| Center Number | Atomic Number | Atomic Type | Coordinates (Angstroms) |           |           |
|---------------|---------------|-------------|-------------------------|-----------|-----------|
|               |               |             | X                       | Y         | Z         |
| 1             | 6             | 0           | -5.173666               | 1.231980  | -0.296868 |
| 2             | 6             | 0           | -3.841164               | 0.900347  | 0.000445  |
| 3             | 6             | 0           | -2.956731               | 1.946042  | 0.309810  |
| 4             | 6             | 0           | -3.392178               | 3.268393  | 0.334181  |
| 5             | 6             | 0           | -4.720084               | 3.582222  | 0.047257  |
| 6             | 6             | 0           | -5.608417               | 2.553003  | -0.269704 |
| 7             | 1             | 0           | -5.874416               | 0.449780  | -0.566165 |
| 8             | 1             | 0           | -1.926882               | 1.698020  | 0.531768  |
| 9             | 1             | 0           | -2.689059               | 4.058040  | 0.578589  |
| 10            | 1             | 0           | -5.058062               | 4.612828  | 0.064322  |
| 11            | 1             | 0           | -6.642551               | 2.781793  | -0.506612 |
| 12            | 6             | 0           | -3.362155               | -0.495708 | -0.004982 |
| 13            | 6             | 0           | -4.164269               | -1.608883 | -0.011819 |
| 14            | 6             | 0           | -1.720412               | -2.027720 | 0.027027  |
| 15            | 1             | 0           | -5.241749               | -1.653012 | 0.000482  |
| 16            | 7             | 0           | -2.005855               | -0.737616 | 0.020355  |
| 17            | 16            | 0           | -3.208087               | -3.053273 | 0.008119  |
| 18            | 7             | 0           | -0.578470               | -2.747449 | 0.048302  |
| 19            | 7             | 0           | 0.630116                | -2.194929 | 0.042360  |
| 20            | 6             | 0           | 0.882781                | -0.902174 | -0.008337 |
| 21            | 1             | 0           | 0.099244                | -0.152455 | -0.051323 |
| 22            | 6             | 0           | 2.251721                | -0.459765 | -0.014305 |
| 23            | 6             | 0           | 2.544638                | 0.927178  | -0.079543 |
| 24            | 6             | 0           | 3.353368                | -1.355509 | 0.043779  |
| 25            | 6             | 0           | 3.842269                | 1.397149  | -0.086788 |
| 26            | 1             | 0           | 1.721463                | 1.632524  | -0.126738 |
| 27            | 6             | 0           | 4.651741                | -0.896095 | 0.036801  |
| 28            | 1             | 0           | 3.140741                | -2.415527 | 0.093327  |
| 29            | 6             | 0           | 4.906179                | 0.485632  | -0.028075 |
| 30            | 1             | 0           | 4.058598                | 2.455653  | -0.137213 |
| 31            | 1             | 0           | 5.488835                | -1.579905 | 0.080533  |
| 32            | 7             | 0           | 6.260835                | 0.967563  | -0.035380 |
| 33            | 8             | 0           | 7.185844                | 0.142774  | 0.016491  |
| 34            | 8             | 0           | 6.457297                | 2.191612  | -0.093194 |

**Table S8.** Cartesian coordinates for the optimized structure of **TH2**.

| Center Number | Atomic Number | Atomic Type | Coordinates (Angstroms) |           |           |
|---------------|---------------|-------------|-------------------------|-----------|-----------|
|               |               |             | X                       | Y         | Z         |
| 1             | 6             | 0           | -5.222787               | 0.895472  | -0.270747 |
| 2             | 6             | 0           | -3.849867               | 0.782097  | -0.004044 |
| 3             | 6             | 0           | -3.121372               | 1.949488  | 0.265460  |
| 4             | 6             | 0           | -3.751304               | 3.190991  | 0.279111  |
| 5             | 6             | 0           | -5.116960               | 3.291328  | 0.021033  |
| 6             | 6             | 0           | -5.849565               | 2.136591  | -0.255949 |
| 7             | 1             | 0           | -5.805771               | 0.012622  | -0.507024 |
| 8             | 1             | 0           | -2.060261               | 1.867397  | 0.461694  |
| 9             | 1             | 0           | -3.172162               | 4.082833  | 0.491640  |
| 10            | 1             | 0           | -5.606316               | 4.258666  | 0.029858  |
| 11            | 1             | 0           | -6.910719               | 2.204277  | -0.468396 |
| 12            | 6             | 0           | -3.167417               | -0.526172 | 0.000944  |
| 13            | 6             | 0           | -3.772122               | -1.752305 | 0.004925  |
| 14            | 6             | 0           | -1.339602               | -1.770453 | 0.026193  |
| 15            | 1             | 0           | -4.820668               | -1.999157 | 0.022548  |
| 16            | 7             | 0           | -1.780722               | -0.558379 | 0.018487  |
| 17            | 16            | 0           | -2.584339               | -3.026831 | 0.016706  |
| 18            | 7             | 0           | -0.013326               | -2.151785 | 0.034756  |
| 19            | 1             | 0           | 0.206108                | -3.143513 | 0.055323  |
| 20            | 7             | 0           | 0.979058                | -1.246268 | 0.014221  |
| 21            | 6             | 0           | 2.188077                | -1.677537 | 0.028537  |
| 22            | 1             | 0           | 2.413113                | -2.750870 | 0.058114  |
| 23            | 6             | 0           | 3.324569                | -0.760565 | 0.006028  |
| 24            | 6             | 0           | 4.627647                | -1.280793 | 0.028924  |
| 25            | 6             | 0           | 3.150791                | 0.634579  | -0.038832 |
| 26            | 6             | 0           | 5.731977                | -0.440333 | 0.008783  |
| 27            | 1             | 0           | 4.776594                | -2.354820 | 0.062976  |
| 28            | 6             | 0           | 4.246961                | 1.478370  | -0.059291 |
| 29            | 1             | 0           | 2.146378                | 1.038113  | -0.057420 |
| 30            | 6             | 0           | 5.549671                | 0.948372  | -0.035586 |
| 31            | 1             | 0           | 6.734289                | -0.849852 | 0.026804  |
| 32            | 1             | 0           | 4.109438                | 2.552139  | -0.093941 |
| 33            | 6             | 0           | 6.681652                | 1.821081  | -0.056635 |
| 34            | 7             | 0           | 7.597462                | 2.526461  | -0.073548 |



**Table S9.** Cartesian coordinates for the optimized structure of **THA2**.

| Center Number | Atomic Number | Atomic Type | Coordinates (Angstroms) |           |           |
|---------------|---------------|-------------|-------------------------|-----------|-----------|
|               |               |             | X                       | Y         | Z         |
| 1             | 6             | 0           | -4.820020               | 1.133369  | -0.244855 |
| 2             | 6             | 0           | -3.466138               | 0.846231  | -0.000081 |
| 3             | 6             | 0           | -2.602553               | 1.924723  | 0.252019  |
| 4             | 6             | 0           | -3.076951               | 3.233844  | 0.270703  |
| 5             | 6             | 0           | -4.424659               | 3.502949  | 0.035311  |
| 6             | 6             | 0           | -5.293316               | 2.441030  | -0.224394 |
| 7             | 1             | 0           | -5.508469               | 0.325833  | -0.466644 |
| 8             | 1             | 0           | -1.557398               | 1.710690  | 0.433855  |
| 9             | 1             | 0           | -2.388432               | 4.048710  | 0.470491  |
| 10            | 1             | 0           | -4.793089               | 4.523214  | 0.047980  |
| 11            | 1             | 0           | -6.343535               | 2.633815  | -0.419375 |
| 12            | 6             | 0           | -2.943369               | -0.533887 | -0.002918 |
| 13            | 6             | 0           | -3.710222               | -1.670843 | -0.004390 |
| 14            | 6             | 0           | -1.248686               | -2.011474 | 0.023823  |
| 15            | 1             | 0           | -4.785725               | -1.749547 | 0.009392  |
| 16            | 7             | 0           | -1.578932               | -0.730251 | 0.015822  |
| 17            | 16            | 0           | -2.708151               | -3.086309 | 0.013331  |
| 18            | 7             | 0           | -0.087762               | -2.690655 | 0.040808  |
| 19            | 7             | 0           | 1.104776                | -2.089282 | 0.034720  |
| 20            | 6             | 0           | 1.310483                | -0.793467 | -0.009048 |
| 21            | 1             | 0           | 0.503386                | -0.068374 | -0.045845 |
| 22            | 6             | 0           | 2.670533                | -0.301276 | -0.015674 |
| 23            | 6             | 0           | 2.918657                | 1.090756  | -0.074550 |
| 24            | 6             | 0           | 3.798894                | -1.157974 | 0.035319  |
| 25            | 6             | 0           | 4.203915                | 1.602245  | -0.082083 |
| 26            | 1             | 0           | 2.073854                | 1.770738  | -0.116360 |
| 27            | 6             | 0           | 5.083302                | -0.654364 | 0.027927  |
| 28            | 1             | 0           | 3.620799                | -2.224896 | 0.079877  |
| 29            | 6             | 0           | 5.314037                | 0.738025  | -0.030659 |
| 30            | 1             | 0           | 4.365417                | 2.673537  | -0.127845 |
| 31            | 1             | 0           | 5.932206                | -1.328299 | 0.067477  |
| 32            | 6             | 0           | 6.638338                | 1.256567  | -0.037429 |
| 33            | 7             | 0           | 7.718767                | 1.679730  | -0.042840 |

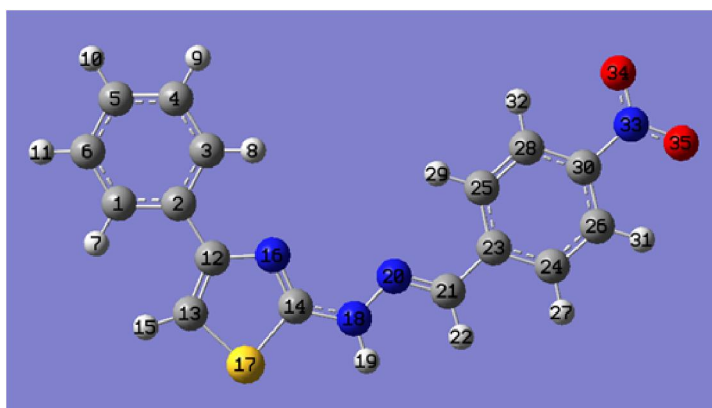

TH1

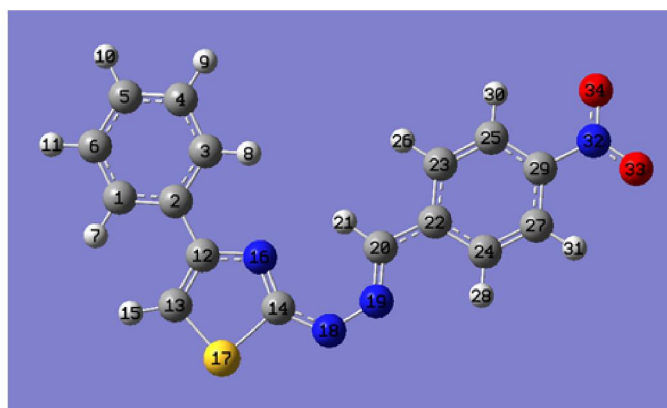

THA1

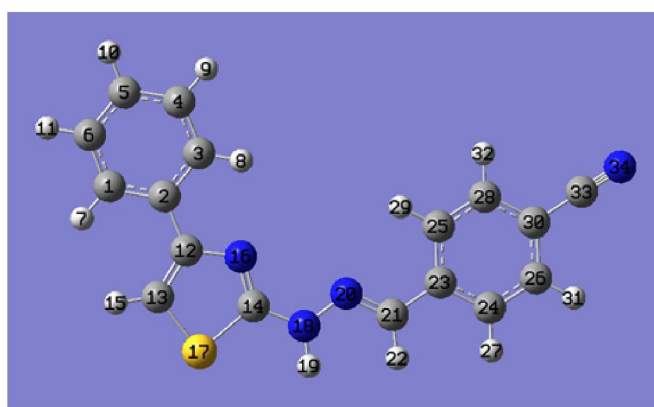

TH2

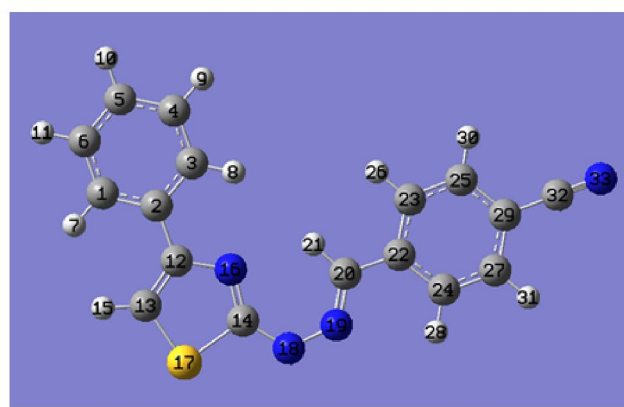

THA2

**Figure S10.** Structures of the THs and THAs optimized by using DFT/B3LYP/6-311++G(d,p) level of theory.

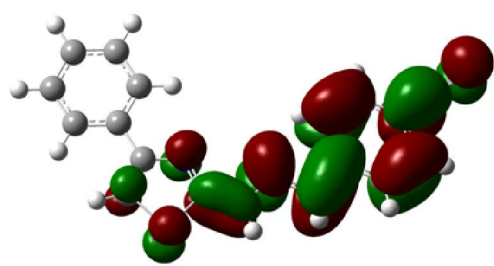

LUMO (-2.50 eV)

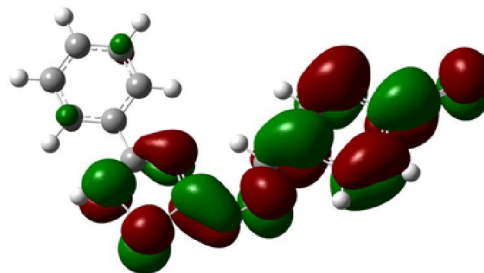

LUMO (+0.95 eV)

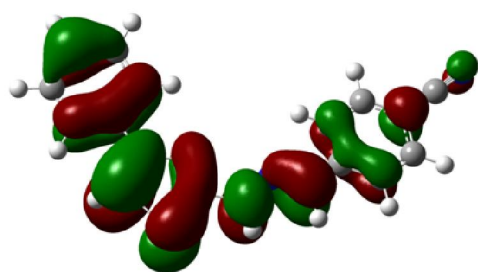

HOMO (-5.88 eV)

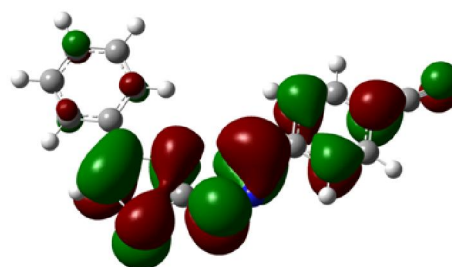

HOMO (-1.80 eV)

**Figure S11.** Contour plots for the frontier molecular orbitals (HOMO and LUMO) of **TH2** (left) and **THA2** (right); the structures were optimized by using DFT/B3LYP/6-311++G(d,p) level of theory. Note that the energies of the MOs are shown in the parentheses.

## Results of NBO Analyses

**Table S10.** Second order perturbation theory analysis of Fock matrix in NBO basis for the hetero atoms containing lone pairs in **TH1**.

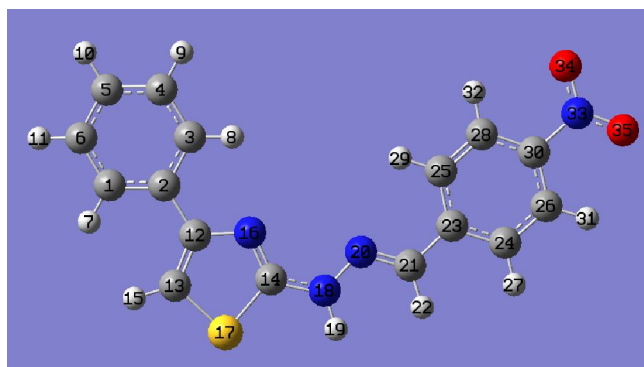

| Donor NBO (i)  | Acceptor NBO (j)       | E <sup>2</sup><br>(kcal/mol) | E(j)-E(i)<br>(a.u.) | F(i,j)<br>(a.u.) |
|----------------|------------------------|------------------------------|---------------------|------------------|
| 75. LP (1) N16 | /567. BD*(1) C12 - C13 | 2.96                         | 0.77                | 0.043            |
| 76. LP (1) S17 | /567. BD*(1) C12 - C13 | 7.94                         | 0.91                | 0.076            |
| 77. LP (2) S17 | /567. BD*(1) C12 - C13 | 0.55                         | 0.62                | 0.020            |
| 78. LP (1) N18 | /572. BD*(1) C14 - N16 | 8.20                         | 0.84                | 0.075            |
| 78. LP (1) N18 | /573. BD*(2) C14 - N16 | 3.53                         | 0.33                | 0.034            |
| 78. LP (1) N18 | /574. BD*(1) C14 - S17 | 0.82                         | 0.84                | 0.024            |
| 78. LP (1) N18 | /578. BD*(1) N20 - C21 | 3.53                         | 0.96                | 0.053            |
| 78. LP (1) N18 | /579. BD*(2) N20 - C21 | 3.61                         | 0.37                | 0.033            |
| 79. LP (1) N20 | /581. BD*(1) C21 - C23 | 16.96                        | 0.60                | 0.092            |
| 80. LP (1) O34 | /595. BD*(1) C30 - N33 | 4.29                         | 1.07                | 0.062            |
| 80. LP (1) O34 | /597. BD*(1) N33 - O35 | 2.31                         | 1.27                | 0.049            |
| 81. LP (2) O34 | /590. BD*(1) C26 - C30 | 0.70                         | 0.84                | 0.022            |
| 81. LP (2) O34 | /595. BD*(1) C30 - N33 | 14.50                        | 0.57                | 0.081            |
| 81. LP (2) O34 | /597. BD*(1) N33 - O35 | 19.72                        | 0.77                | 0.112            |
| 82. LP (3) O34 | /598. BD*(2) N33 - O35 | 171.84                       | 0.15                | 0.146            |
| 83. LP (1) O35 | /595. BD*(1) C30 - N33 | 4.29                         | 1.06                | 0.062            |
| 83. LP (1) O35 | /596. BD*(1) N33 - O34 | 2.30                         | 1.27                | 0.049            |
| 84. LP (2) O35 | /593. BD*(1) C28 - C30 | 0.70                         | 0.84                | 0.022            |
| 84. LP (2) O35 | /595. BD*(1) C30 - N33 | 14.48                        | 0.57                | 0.081            |
| 84. LP (2) O35 | /596. BD*(1) N33 - O34 | 19.74                        | 0.77                | 0.112            |

**Table S11.** Second order perturbation theory analysis of Fock matrix in NBO basis for the hetero atoms containing lone pairs in **THA1**.

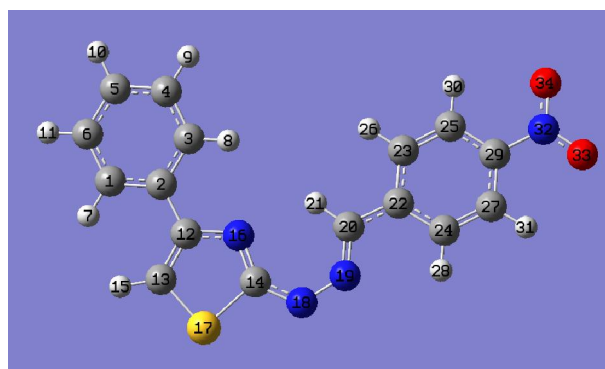

| Donor NBO (i)  | Acceptor NBO (j)       | $E^2$<br>(kcal/mol) | $E(j)-E(i)$<br>(a.u.) | $F(i,j)$<br>(a.u.) |
|----------------|------------------------|---------------------|-----------------------|--------------------|
| 75. LP (1) N16 | /561. BD*(1) C12 - C13 | 3.10                | 0.75                  | 0.043              |
| 75. LP (1) N16 | /568. BD*(1) C14 - S17 | 5.99                | 0.86                  | 0.064              |
| 75. LP (1) N16 | /569. BD*(1) C14 - N18 | 1.23                | 0.73                  | 0.027              |
| 76. LP (1) S17 | /561. BD*(1) C12 - C13 | 8.43                | 0.90                  | 0.078              |
| 76. LP (1) S17 | /566. BD*(1) C14 - N16 | 6.52                | 1.03                  | 0.073              |
| 77. LP (1) N18 | /566. BD*(1) C14 - N16 | 8.46                | 0.92                  | 0.080              |
| 77. LP (1) N18 | /571. BD*(1) N19 - C20 | 8.90                | 1.03                  | 0.087              |
| 77. LP (1) N18 | /572. BD*(2) N19 - C20 | 5.13                | 0.43                  | 0.043              |
| 78. LP (2) N18 | /566. BD*(1) C14 - N16 | 0.81                | 0.69                  | 0.024              |
| 78. LP (2) N18 | /567. BD*(2) C14 - N16 | 45.43               | 0.18                  | 0.082              |
| 78. LP (2) N18 | /568. BD*(1) C14 - S17 | 0.95                | 0.68                  | 0.026              |
| 78. LP (2) N18 | /572. BD*(2) N19 - C20 | 12.04               | 0.20                  | 0.048              |
| 79. LP (1) N19 | /569. BD*(1) C14 - N18 | 1.28                | 0.56                  | 0.025              |
| 79. LP (1) N19 | /572. BD*(2) N19 - C20 | 1.97                | 0.22                  | 0.019              |
| 79. LP (1) N19 | /574. BD*(1) C20 - C22 | 16.13               | 0.59                  | 0.092              |
| 80. LP (1) O33 | /588. BD*(1) C29 - N32 | 4.28                | 1.07                  | 0.062              |
| 80. LP (1) O33 | /591. BD*(1) N32 - O34 | 2.36                | 1.27                  | 0.049              |
| 81. LP (2) O33 | /580. BD*(1) C24 - C27 | 0.51                | 0.87                  | 0.019              |
| 81. LP (2) O33 | /583. BD*(1) C25 - C29 | 0.70                | 0.84                  | 0.022              |
| 81. LP (2) O33 | /588. BD*(1) C29 - N32 | 14.08               | 0.58                  | 0.081              |
| 81. LP (2) O33 | /591. BD*(1) N32 - O34 | 19.92               | 0.78                  | 0.112              |
| 82. LP (1) O34 | /588. BD*(1) C29 - N32 | 4.29                | 1.07                  | 0.062              |
| 82. LP (1) O34 | /589. BD*(1) N32 - O33 | 2.35                | 1.27                  | 0.049              |
| 83. LP (2) O34 | /578. BD*(1) C23 - C25 | 0.51                | 0.86                  | 0.019              |
| 83. LP (2) O34 | /586. BD*(1) C27 - C29 | 0.70                | 0.85                  | 0.022              |
| 83. LP (2) O34 | /588. BD*(1) C29 - N32 | 14.04               | 0.58                  | 0.080              |
| 83. LP (2) O34 | /589. BD*(1) N32 - O33 | 19.91               | 0.78                  | 0.113              |
| 84. LP (3) O34 | /584. BD*(2) C25 - C29 | 0.55                | 0.29                  | 0.011              |
| 84. LP (3) O34 | /590. BD*(2) N32 - O33 | 155.35              | 0.15                  | 0.145              |

**Table S12.** Second order perturbation theory analysis of Fock matrix in NBO basis for the hetero atoms containing lone pairs in **TH2**.

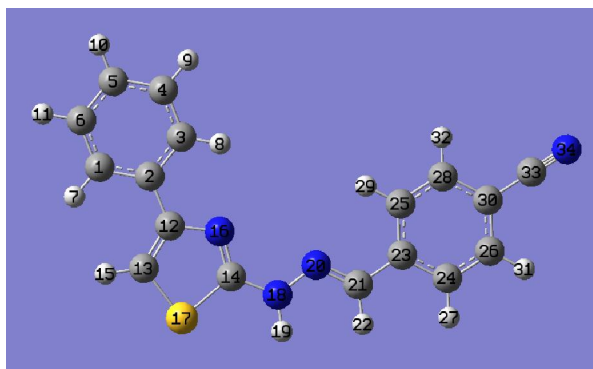

| Donor NBO (i)  | Acceptor NBO (j)       | $E^2$<br>(kcal/mol) | $E(j)-E(i)$<br>(a.u.) | $F(i,j)$<br>(a.u.) |
|----------------|------------------------|---------------------|-----------------------|--------------------|
| 74. LP (1) N16 | /546. BD*(1) C12 - C13 | 2.96                | 0.77                  | 0.043              |
| 74. LP (1) N16 | /553. BD*(1) C14 - S17 | 5.65                | 0.87                  | 0.063              |
| 74. LP (1) N16 | /554. BD*(1) C14 - N18 | 1.50                | 0.69                  | 0.029              |
| 75. LP (1) S17 | /546. BD*(1) C12 - C13 | 7.90                | 0.91                  | 0.076              |
| 75. LP (1) S17 | /551. BD*(1) C14 - N16 | 6.54                | 1.01                  | 0.073              |
| 76. LP (1) N18 | /551. BD*(1) C14 - N16 | 8.22                | 0.84                  | 0.075              |
| 76. LP (1) N18 | /552. BD*(2) C14 - N16 | 3.54                | 0.33                  | 0.034              |
| 76. LP (1) N18 | /553. BD*(1) C14 - S17 | 0.81                | 0.84                  | 0.024              |
| 76. LP (1) N18 | /557. BD*(1) N20 - C21 | 3.53                | 0.96                  | 0.053              |
| 76. LP (1) N18 | /558. BD*(2) N20 - C21 | 3.47                | 0.38                  | 0.032              |
| 77. LP (1) N20 | /560. BD*(1) C21 - C23 | 16.91               | 0.60                  | 0.092              |
| 80. LP (1) N34 | /573. BD*(1) C30 - C33 | 10.97               | 0.87                  | 0.087              |

**Table S13.** Second order perturbation theory analysis of Fock matrix in NBO basis for the hetero atoms containing lone pairs in **THA2**.

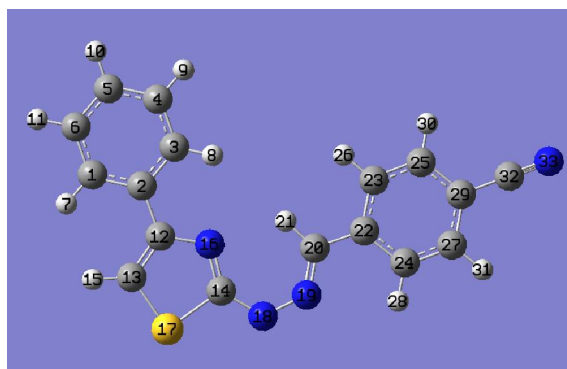

| Donor NBO (i)  | Acceptor NBO (j)       | $E^2$<br>(kcal/mol) | $E(j)-E(i)$<br>(a.u.) | $F(i,j)$<br>(a.u.) |
|----------------|------------------------|---------------------|-----------------------|--------------------|
| 74. LP (1) N16 | /539. BD*(1) C12 - C13 | 3.11                | 0.74                  | 0.043              |
| 74. LP (1) N16 | /546. BD*(1) C14 - S17 | 6.04                | 0.86                  | 0.065              |
| 74. LP (1) N16 | /547. BD*(1) C14 - N18 | 1.21                | 0.73                  | 0.027              |
| 75. LP (1) S17 | /539. BD*(1) C12 - C13 | 8.53                | 0.90                  | 0.079              |
| 75. LP (1) S17 | /544. BD*(1) C14 - N16 | 6.50                | 1.03                  | 0.073              |
| 76. LP (1) N18 | /544. BD*(1) C14 - N16 | 8.58                | 0.91                  | 0.080              |
| 76. LP (1) N18 | /549. BD*(1) N19 - C20 | 8.95                | 1.02                  | 0.087              |
| 76. LP (1) N18 | /550. BD*(2) N19 - C20 | 5.95                | 0.43                  | 0.046              |
| 77. LP (2) N18 | /544. BD*(1) C14 - N16 | 0.77                | 0.69                  | 0.023              |
| 77. LP (2) N18 | /545. BD*(2) C14 - N16 | 45.22               | 0.18                  | 0.083              |
| 77. LP (2) N18 | /546. BD*(1) C14 - S17 | 0.96                | 0.68                  | 0.025              |
| 77. LP (2) N18 | /550. BD*(2) N19 - C20 | 10.65               | 0.20                  | 0.044              |
| 78. LP (1) N19 | /547. BD*(1) C14 - N18 | 0.98                | 0.56                  | 0.022              |
| 78. LP (1) N19 | /550. BD*(2) N19 - C20 | 0.91                | 0.22                  | 0.013              |
| 78. LP (1) N19 | /552. BD*(1) C20 - C22 | 17.51               | 0.58                  | 0.094              |
| 79. LP (1) N33 | /566. BD*(1) C29 - C32 | 10.53               | 0.88                  | 0.086              |

## References

1. R. I. Stock, L. G. Nandi, C. R. Nicoletti, A. D. S. Schramm, S. L. Meller, R. S. Heying, D. F. Coimbra, K. F. Andriani, G. F. Caramori, A. J. Bortoluzzi and V. G. Machado, *J. Org. Chem.*, 2015, **80**, 7971–7983.
2. C. T. Martins, M. S. Lima, E. L. Bastos, and O. A. El Seoud, *Eur. J. Org. Chem.*, 2008, 1165–1180.
3. J. Catalán, *J. Phys. Chem. B*, 2009, **113**, 5951–5960.
4. N. Friebe, K. Schreiter, J. Kübel, B. Dietzek, N. Moszner, P. Burtscher, A. Oehlke and S. Spange, *New J. Chem.*, 2015, **39**, 5171–5179.
5. L. G. Nandi, F. Facin, V. G. Marini, L. M. Zimmermann, L. A. Giusti, R. da Silva, G. F. Caramori and V. G. Machado, *J. Org. Chem.*, 2012, **77**, 10668–10679.
6. R. I. Stock, L. G. Nandi, C. R. Nicoletti, A. D. S. Schramm, S. L. Meller, R. S. Heying, D. F. Coimbra, K. F. Andriani, G. F. Caramori, A. J. Bortoluzzi and V. G. Machado, *J. Org. Chem.*, 2015, **80**, 7971–7983.
7. R. I. Stock, A. D. S. Schramm, M. C. Rezende and V. G. Machado, *Phys. Chem. Chem. Phys.*, 2016, **18**, 20266–20269.
